# Supplementary material for: Accelerating water transport through a charged SWCNT: a molecular dynamics simulation
Source: Royal Society of Chemistry journal article supplement (doi:10.1039/c3cp51855h), 2013-01-01
Supplement: c3cp51855h.pdf [file c3cp51855h.pdf]

## Electronic Supplementary Information

### Accelerating water transport through a charged SWCNT: a molecular dynamics simulation

Diannan Lu\*

Department of Chemical Engineering, Tsinghua University, Beijing, 10084

\* Corresponding author: [ludiannan@tsinghua.edu.cn](mailto:ludiannan@tsinghua.edu.cn)

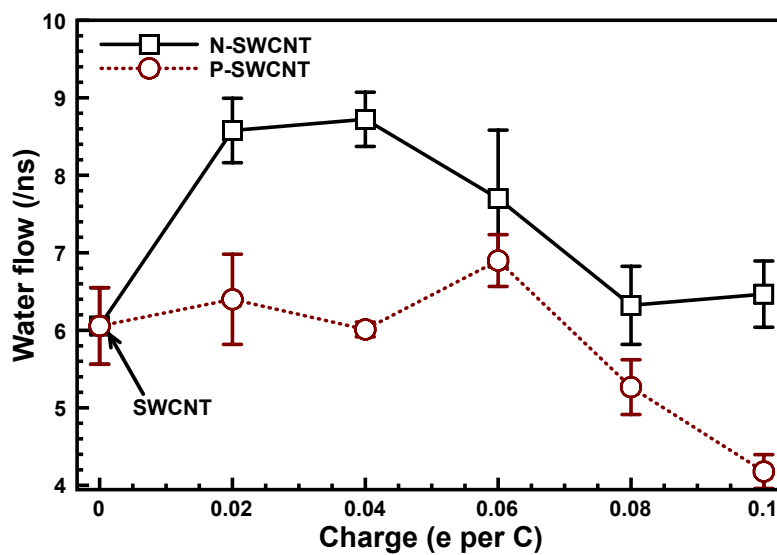

**Figure S1.** The water flow as a function of SWCNT surface charge  
Water model is TIP3P.

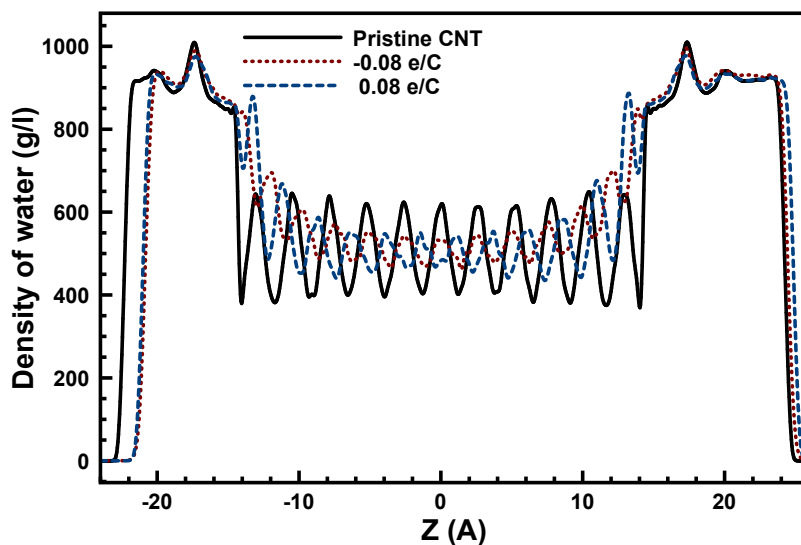

**Figure S2.** The density profile of water molecules inside carbon nanotubes of 3.0nm  
 in length

**Table S1.** Water flow through different SWCNTs with 3.0nm in length

| Charge (e/C)     | Water flow (/ns) | Charge (e/C)     | Water flow (/ns) |
|------------------|------------------|------------------|------------------|
| 0.000 (Pristine) | 1.408±0.266      | 0.000 (Pristine) | 1.408±0.266      |
| -0.025           | 1.558±0.072      | 0.025            | 1.392±0.201      |
| -0.050           | 2.311±0.158      | 0.050            | 1.605±0.155      |
| -0.080           | 2.397±0.562      | 0.080            | 1.311±0.517      |
| -0.100           | 2.950±0.407      | 0.100            | 1.211±0.418      |

**Table S2.** Water flow through different SWCNTs with 5.0nm in length

| Charge (e/C)     | Water flow (/ns) | Charge (e/C)     | Water flow (/ns) |
|------------------|------------------|------------------|------------------|
| 0.000 (Pristine) | 1.417±0.210      | 0.000 (Pristine) | 1.417±0.210      |
| -0.025           | 1.433±0.459      | 0.025            | 1.300±0.497      |
| -0.050           | 1.883±0.429      | 0.050            | 1.350±0.082      |
| -0.080           | 1.667±0.624      | 0.080            | 1.032±0.380      |
| -0.100           | 0.950±0.236      | 0.100            | 0.536±0.209      |

**Table S3** Water flow through different SWCNTs with different diameter

| Format   | Charge | Diameter (nm) | Area (nm <sup>2</sup> ) | Water flux (/ns) | Water flow (/ns□□□ <sup>2</sup> ) |
|----------|--------|---------------|-------------------------|------------------|-----------------------------------|
| (6, 6)   | 0.00   | 0.824         | 0.533                   | 3.0              | 5.63                              |
| (6, 6)   | -0.08  | 0.824         | 0.533                   | 6.0              | 11.17                             |
| (11, 11) | 0.00   | 1.510         | 1.791                   | 151.2            | 84.42                             |
| (11, 11) | -0.08  | 1.510         | 1.791                   | 220.3            | 123.00                            |
| (16, 16) | 0.00   | 2.197         | 3.789                   | 338.5            | 89.34                             |
| (16, 16) | -0.08  | 2.197         | 3.789                   | 428.7            | 113.15                            |
| (21, 21) | 0.00   | 2.884         | 6.528                   | 539.8            | 82.70                             |
| (21, 21) | -0.00  | 2.884         | 6.528                   | 552.0            | 84.56                             |
